# Supplementary material for: Role of Plasma Gelsolin Protein in the Final Stage of Erythropoiesis and in Correction of Erythroid Dysplasia In Vitro
Source: MDPI journal article supplement (doi:10.3390/ijms21197132), 2020-09-27
Supplement: s1 [file s1]

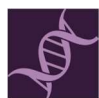

# Role of Plasma Gelsolin Protein in the Final Stage of Erythropoiesis and in Correction of Erythroid Dysplasia In Vitro

So Yeon Han <sup>1,2</sup>, Eun Mi Lee <sup>2</sup>, Suyeon Kim <sup>1</sup>, Amy M. Kwon <sup>3</sup> and Eun Jung Baek <sup>1,2,\*</sup>

<sup>1</sup> Department of Laboratory Medicine, College of Medicine, Hanyang University, Seoul, Republic of Korea; soyeon806@gmail.com (S.Y.H.); rainbow1114@hanmail.net (S.K.)

<sup>2</sup> Department of Translational Medicine, Graduate School of Biomedical Science and Engineering, Hanyang University, Seoul, Republic of Korea; ghlfle@gmail.com

<sup>3</sup> Biostatistical Consulting and Research Laboratory, Medical Research Collaborating Center, Industry-University Cooperation Foundation, Hanyang University, Seoul, Republic of Korea; amykwon@hanyang.ac.kr

\* Correspondence: doceunjang@hanyang.ac.kr; Tel: +82-31-560-2485; Fax: +82-31-560-2489

**Table S1.** Clinical characteristics of bone marrow samples used for cell culture.

| Case No. | Chromosomal analysis                                                                                                                                                                 |
|----------|--------------------------------------------------------------------------------------------------------------------------------------------------------------------------------------|
| 1        | 47,XY,i(17)(q10),+19[4]/48,idem,+13[16]                                                                                                                                              |
| 2        | 46,XX,del(11)(q23)[11]/47,idem,+8[7]/46,XX[2]                                                                                                                                        |
| 3        | 46,XY[20]                                                                                                                                                                            |
| 4        | 43~45,Y,add(X)(q28),-4,der(5;21)(p10;q10),+der(5;21),-6,-9,add(11)(p15),der(14)t(?;14)((?;p11.2)t(?;4)(?;q12),del(17)(q25),-18,add(18)(q21), +add(19)(q13.3),i(21)(q10),+i(21)[cp20] |
| 5        | 47,XY,del(1)(p36.1),del(5)(q13),+8[20]                                                                                                                                               |

Chromosomal analysis of bone marrow aspirates from myelodysplastic syndrome patients were performed by G-banded karyotyping using standard techniques. Whenever possible, 20 metaphases were analyzed. Chromosomal abnormalities are described according to the International System for Human Cytogenetic Nomenclature.

**Table S2.** Primer sequences.

| Gene          | Forward (5'-3')            | Reverse (5'-3')          |
|---------------|----------------------------|--------------------------|
| <i>GSN</i>    | CTTTGCCTGCTCCAACAAGA       | CCGTCTCGATGTACCGCTTA     |
| <i>GATA-1</i> | CCAAGCTTCGTGGAAGCTCTC      | CCTGCCCGTTTACTGACAAT     |
| <i>ROCK-1</i> | AGGAAGGCGGACATATTAGTCCCT   | AGACGATAGTTGGGTCCCGGC    |
| <i>RhoA</i>   | CTCATAGTCTTCAGCAAGGACCAGTT | ATCATTCGGAAGATCCTTCTTATT |
| <i>DLC-1</i>  | AGTGCGTGCAACAAGCGGGT       | TCCGGGTAGCTCTCGCGGTT     |
| <i>ICAM-4</i> | CCGGACTAAGCGGGCGCAAA       | AGCCACGAAGTCCGGGCTCA     |
| <i>GAPDH</i>  | GAAGGTGAAGGTCGGAGT         | GACAAGCTTCCCGTTCTCAG     |

Abbreviations: *GSN*, Gelsolin; *GATA-1*, GATA Binding Protein 1; *ROCK-1*, Rho-associated coiled-coil protein kinase 1; *RhoA*, Ras homolog gene family member A; *DLC-1*, Deleted in liver cancer-1; *ICAM-4*, Intercellular Adhesion Molecule 4; *GAPDH*, Glyceraldehyde 3-phosphate dehydrogenase.

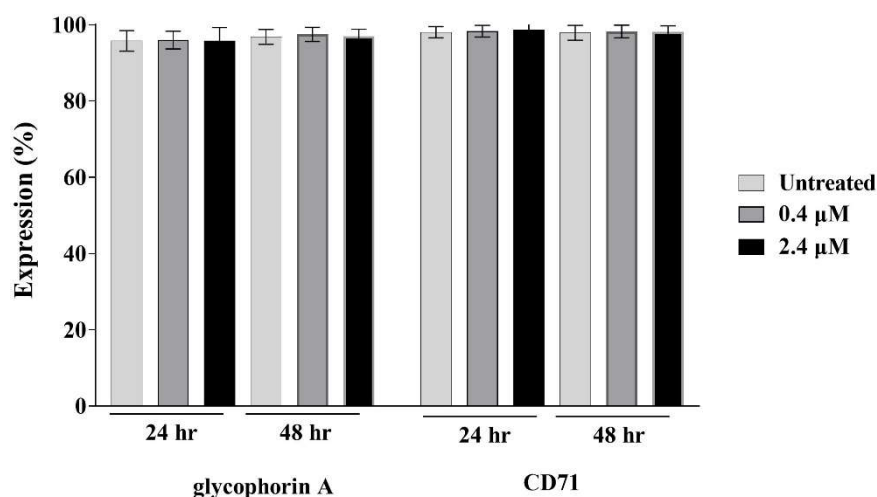

**Figure S1.** Effect of pGSN on terminal maturation of mature erythroid cells. Erythroid cell specific surface markers were measured by flow cytometry using antibodies against glycophorin A and CD71 at 24 - 48 hr of pGSN treatment in the cells at the polychromatic and orthochromatic erythroblast stages ( $n = 3$ ). Data are mean  $\pm$  SD.

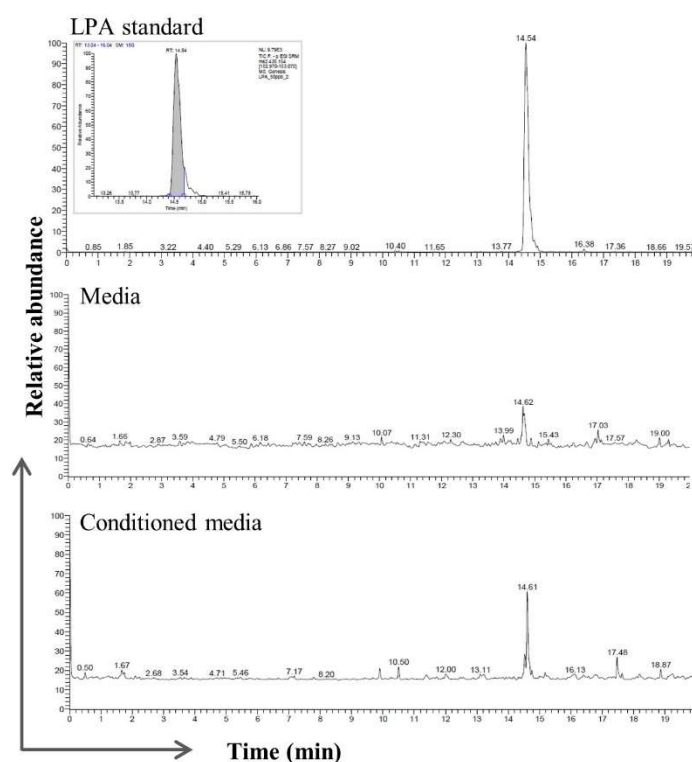

**Figure S2.** Detection of lysophosphatidic acid (LPA). LPA was measured using electrospray-ionization liquid chromatography/mass spectrometry in the raw media and conditioned media which were media soup harvested after culture of erythroid cells with 2.4  $\mu$ M pGSN for 24 hr.

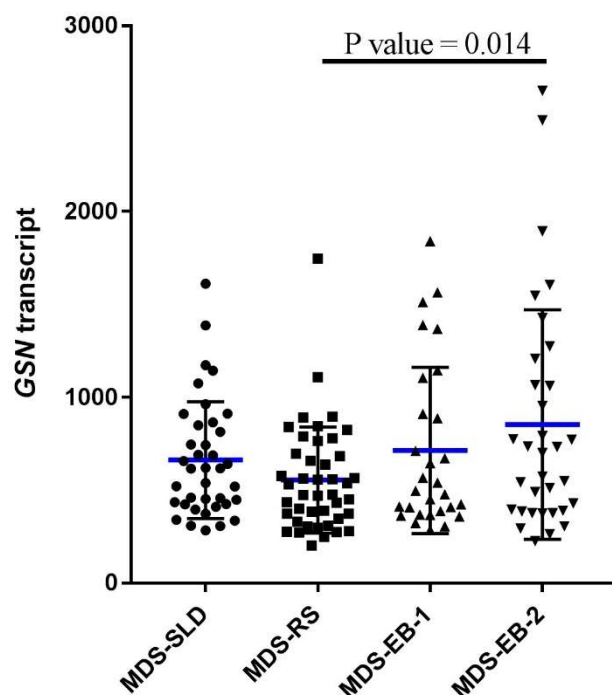

**Figure S3.** GSN mRNA expression in patients with MDS subgroups. The expression levels of GSN mRNA were compared among MDS subgroups (\* $P < 0.05$ , one-way ANOVA, Tukey's multiple comparison test). The lines are mean  $\pm$  SD.

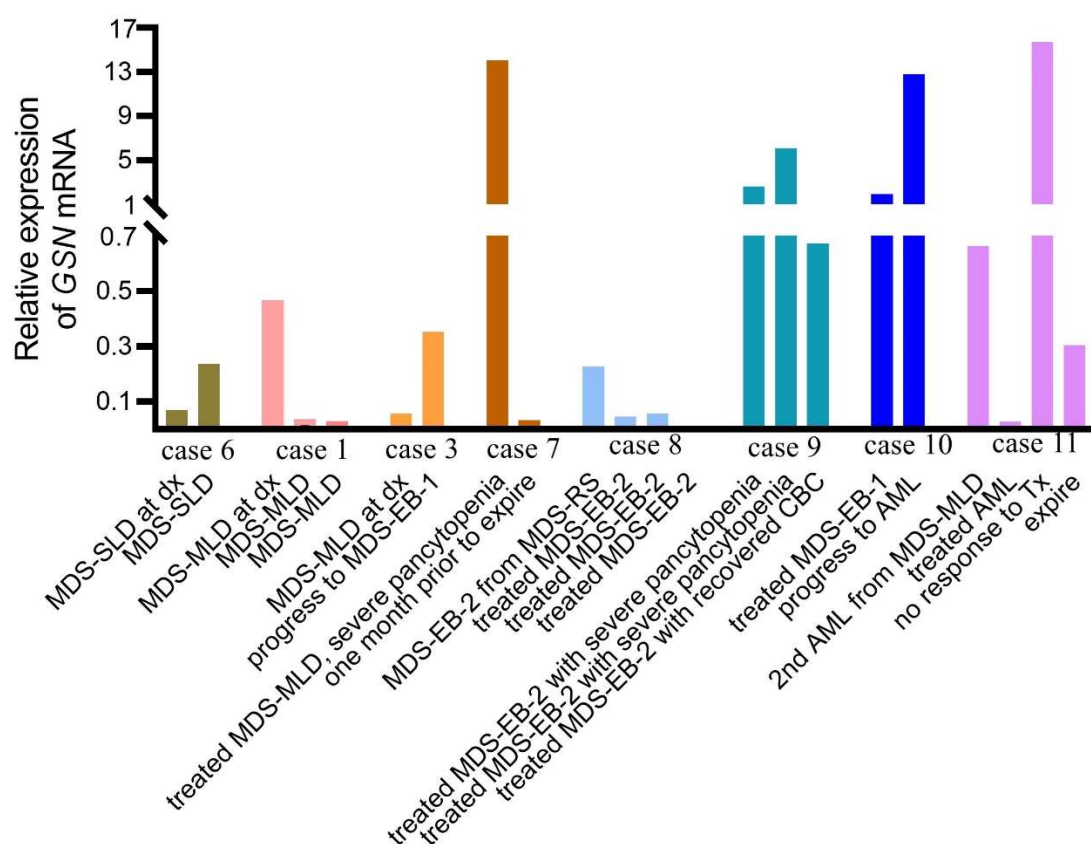

**Figure S4.** Follow up of PB GSN mRNA transcript levels. The GSN mRNA expression levels were evaluated for patients with MDS. After normalization to *GAPDH*, relative GSN mRNA expression

levels of peripheral blood (PB) buffy coat cells from eight MDS patients normalized to that of that of healthy donors by RT-qPCR were followed up. Cases 1, 3, and 6 are evaluated from diagnosis timing (at dx), the other samples are acquired after treatment. The same colors mean samples from the same patients. Tx., treatment. The cases usually showed decreased *GSN* level at diagnosis and treatment. The cases with MDS-RS (case 8) which evolved to MDS-EB-2 showed continuously decreased levels, probably related to the disrupted ring sideroblasts. In case 10, the secondary AML progressed from MDS-EB-1 showed increased *GSN* levels, consistent with the increased level in MDS-EB-2, which must be present before worsening to AML. Cases 7 and 11 showed decreased *GSN* levels near expiration. These data show the increasing tendency of *GSN* mRNA when MDS diseases progress, while *GSN* expression remained low when the patients responded to treatment. .

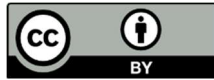

© 2020 by the authors. Submitted for possible open access publication under the terms and conditions of the Creative Commons Attribution (CC BY) license (<http://creativecommons.org/licenses/by/4.0/>).
